# Supplementary material for: Homoleptic octahedral CoII complexes as precatalysts for regioselective hydroboration of alkenes with high turnover frequencies
Source: Royal Society of Chemistry journal article supplement (doi:10.1039/d3ra06113b), 2023-01-01
Supplement: d3ra06113b1.pdf [file d3ra06113b1.pdf]

***Electronic Supplementary Information:***

**Homoleptic octahedral Co<sup>II</sup> complexes as precatalysts for regioselective hydroboration of alkenes with high turnover frequencies**

Guoqi Zhang,<sup>\*,a</sup> Haisu Zeng,<sup>a,b</sup> Nora Zadori,<sup>a</sup> Camila Marino,<sup>a</sup> Shengping Zheng,<sup>b</sup> and Michelle C. Neary<sup>b</sup>

<sup>a</sup> Department of Sciences, John Jay College and Ph.D. Program in Chemistry, The Graduate Center of the City University of New York, New York, 10019 NY, USA.

<sup>b</sup> Department of Chemistry, Hunter College, the City University of New York, New York, 10065 NY, USA.

**Table S1.** X-ray crystallographic data for **1-3**.

|                                                              | <b>1</b> •CH <sub>2</sub> Cl <sub>2</sub>                                                       | <b>2</b> •CH <sub>3</sub> CN                                                   | <b>3</b>                                                                        |
|--------------------------------------------------------------|-------------------------------------------------------------------------------------------------|--------------------------------------------------------------------------------|---------------------------------------------------------------------------------|
| lattice                                                      | Monoclinic                                                                                      | Monoclinic                                                                     | Monoclinic                                                                      |
| formula                                                      | C <sub>41</sub> H <sub>31</sub> B <sub>3</sub> Cl <sub>2</sub> CoF <sub>12</sub> N <sub>8</sub> | C <sub>42</sub> H <sub>31</sub> B <sub>2</sub> CoF <sub>8</sub> N <sub>9</sub> | C <sub>40</sub> H <sub>29</sub> B <sub>3</sub> F <sub>12</sub> FeN <sub>8</sub> |
| formula weight                                               | 1026.00                                                                                         | 894.31                                                                         | 937.99                                                                          |
| space group                                                  | <i>P2<sub>1</sub>/c</i>                                                                         | <i>Pc</i>                                                                      | <i>P2<sub>1</sub>/c</i>                                                         |
| <i>a</i> /Å                                                  | 14.147(4)                                                                                       | 8.7498(3)                                                                      | 14.1345(6)                                                                      |
| <i>b</i> /Å                                                  | 16.117(4)                                                                                       | 25.9051(8)                                                                     | 15.9916(7)                                                                      |
| <i>c</i> /Å                                                  | 18.997(5)                                                                                       | 8.5927(3)                                                                      | 18.7291(8)                                                                      |
| $\alpha$ /°                                                  | 90                                                                                              | 90                                                                             | 90                                                                              |
| $\beta$ /°                                                   | 105.971(5)                                                                                      | 90.761(2)                                                                      | 105.142(3)                                                                      |
| $\gamma$ /°                                                  | 90                                                                                              | 90                                                                             | 90                                                                              |
| <i>V</i> /Å <sup>3</sup>                                     | 4164.2(18)                                                                                      | 1947.49(11)                                                                    | 4086.4(3)                                                                       |
| <i>Z</i>                                                     | 4                                                                                               | 2                                                                              | 4                                                                               |
| temperature (K)                                              | 130(2)                                                                                          | 130(2)                                                                         | 130(2)                                                                          |
| radiation ( $\lambda$ , Å)                                   | 0.71073                                                                                         | 1.54178                                                                        | 1.54178                                                                         |
| $\rho$ (calcd.) g cm <sup>-3</sup>                           | 1.637                                                                                           | 1.525                                                                          | 1.525                                                                           |
| $\mu$ (Mo/Cu K $\alpha$ ), mm <sup>-1</sup>                  | 0.639                                                                                           | 4.192                                                                          | 3.827                                                                           |
| $\theta$ max, deg.                                           | 31.240                                                                                          | 74.507                                                                         | 72.104                                                                          |
| no. of data collected                                        | 129751                                                                                          | 48092                                                                          | 79057                                                                           |
| no. of data                                                  | 13527                                                                                           | 7602                                                                           | 7970                                                                            |
| no. of parameters                                            | 639                                                                                             | 601                                                                            | 615                                                                             |
| <i>R</i> <sub>1</sub> [ <i>I</i> > 2 $\sigma$ ( <i>I</i> )]  | 0.0569                                                                                          | 0.0553                                                                         | 0.1048                                                                          |
| <i>wR</i> <sub>2</sub> [ <i>I</i> > 2 $\sigma$ ( <i>I</i> )] | 0.1465                                                                                          | 0.1335                                                                         | 0.2103                                                                          |
| <i>R</i> <sub>1</sub> [all data]                             | 0.0787                                                                                          | 0.0613                                                                         | 0.1342                                                                          |
| <i>wR</i> <sub>2</sub> [all data]                            | 0.1596                                                                                          | 0.1373                                                                         | 0.2263                                                                          |
| GOF                                                          | 1.091                                                                                           | 1.073                                                                          | 1.082                                                                           |
| <i>R</i> <sub>int</sub>                                      | 0.0512                                                                                          | 0.1115                                                                         | 0.1852                                                                          |

**Characterization data of isolated products.**

**7a**<sup>1</sup>: Colorless oil. Yield: 192 mg (83%). <sup>1</sup>H NMR (600 MHz, CDCl<sub>3</sub>) δ 7.33 – 7.25 (m, 4H), 7.17 (tt, *J* = 6.8, 1.5 Hz, 1H), 2.48 (q, *J* = 7.5 Hz, 1H), 1.38 (d, *J* = 7.5 Hz, 3H), 1.24 (d, *J* = 8.1 Hz, 12H) ppm; <sup>13</sup>C NMR (151 MHz, CDCl<sub>3</sub>) δ 208.4, 145.0, 128.4, 127.9, 125.1, 83.3, 24.4, 17.0 ppm. GC-MS (m/z): 232 (calc. 232).

**7b**<sup>1</sup>: Colorless oil. Yield: 191 mg (78%). <sup>1</sup>H NMR (600 MHz, CDCl<sub>3</sub>) δ 7.13 (d, *J* = 8.1 Hz, 2H), 7.10 – 7.02 (m, 2H), 2.41 (q, *J* = 7.6 Hz, 1H), 2.32 (d, *J* = 2.3 Hz, 3H), 1.33 (d, *J* = 7.6 Hz, 3H), 1.26 – 1.16 (m, 12H) ppm; <sup>13</sup>C NMR (151 MHz, CDCl<sub>3</sub>) δ 141.9, 134.4, 129.0, 127.7, 83.2, 29.5, 24.6, 21.0, 17.3 ppm. GC-MS (m/z): 246 (calc. 246). *t*<sub>r</sub> = 14.9 min (major), *t*<sub>r</sub> = 16.1 min (minor). Note: signals for a small amount of the minor regioisomer were still observed in the NMR spectra after purification by column chromatography.

**7d**<sup>1</sup>: Colorless oil. Yield: 160 mg (60%). <sup>1</sup>H NMR (500 MHz, CDCl<sub>3</sub>) δ 7.22 (d, *J* = 8.5 Hz, 2H), 7.15 (d, *J* = 8.5 Hz, 2H), 2.41 (q, *J* = 7.5 Hz, 1H), 1.32 (d, *J* = 7.5 Hz, 3H), 1.21 (d, *J* = 5.6 Hz, 12H) ppm; <sup>13</sup>C NMR (126 MHz, CDCl<sub>3</sub>) δ 143.5, 130.7, 129.1, 128.4, 83.4, 29.4, 24.6, 24.6, 17.0 ppm. GC-MS (m/z): 266 (calc. 266).

**7f**<sup>1</sup>: White solid of **2i**. Yield: 150 mg (50%). <sup>1</sup>H NMR (500 MHz, CDCl<sub>3</sub>) δ 7.41 (s, 2H), 7.24 (d, *J* = 8.2 Hz, 2H), 2.42 (q, *J* = 7.5 Hz, 1H), 1.27 (d, *J* = 7.5 Hz, 3H), 1.13 (s, 12H) ppm; <sup>13</sup>C NMR (126 MHz, CDCl<sub>3</sub>) δ 149.3, 134.0, 128.0, 127.4 (q, *J* = 32.2 Hz), 125.2 (q, *J* = 3.8 Hz), 124.5 (q, *J* = 271.8 Hz), 83.6, 29.9, 24.6, 16.7 ppm. GC-MS (m/z): 300 (calc. 300).

**7g**<sup>1</sup>: Yellowish oil. Yield: 183 mg (70%). <sup>1</sup>H NMR (600 MHz, CDCl<sub>3</sub>) δ 7.15 (d, *J* = 8.7 Hz, 2H), 6.82 (d, *J* = 8.8 Hz, 2H), 3.77 (s, 3H), 2.38 (q, *J* = 7.5 Hz, 1H), 1.31 (d, *J* = 7.6 Hz, 3H), 1.25 (s, 12H) ppm; <sup>13</sup>C NMR (151 MHz, CDCl<sub>3</sub>) δ 128.6, 113.8, 83.2, 55.2, 29.1, 24.6, 24.6, 17.4 ppm. GC-MS (m/z): 262 (calc. 262). Note: signals for a small amount of the minor regioisomer were still observed in the NMR spectra after purification by column chromatography.

**7h**<sup>1</sup>: White solid. Yield: 209 mg (68%). <sup>1</sup>H NMR (600 MHz, CDCl<sub>3</sub>) δ 7.17 – 7.12 (m, 4H), 7.12 – 7.06 (m, 4H), 7.02 (ddt, *J* = 6.5, 4.8, 2.1 Hz, 2H), 3.06 (dd, *J* = 13.5, 9.8 Hz, 1H), 2.87 (dd, *J* = 13.5, 6.9 Hz, 1H), 2.60 (dd, *J* = 9.8, 6.9 Hz, 1H), 0.99 (s, 12H) ppm; <sup>13</sup>C NMR (151 MHz, CDCl<sub>3</sub>) δ 142.7, 141.8, 129.0, 128.9, 128.6, 128.5, 128.4, 128.3, 128.2, 128.0, 125.9, 125.5, 83.4, 39.0, 34.5, 24.7 ppm. GC-MS (*m/z*): 308 (calc. 308).

**7m**<sup>1</sup>: Colorless oil. Yield: 179 mg (85%). <sup>1</sup>H NMR (500 MHz, CDCl<sub>3</sub>) δ 1.62 – 1.48 (m, 5H, overlapping), 1.29 – 1.18 (m, 6H), 1.16 (s, 12H) ppm; <sup>13</sup>C NMR (126 MHz, CDCl<sub>3</sub>) δ 82.7, 29.7, 28.0, 27.1, 26.8, 24.8 ppm. GC-MS (*m/z*): 210 (calc. 210).

**Copies of NMR spectra:**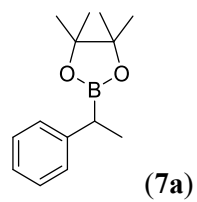 $^1\text{H}$  NMR (600 MHz,  $\text{CDCl}_3$ ):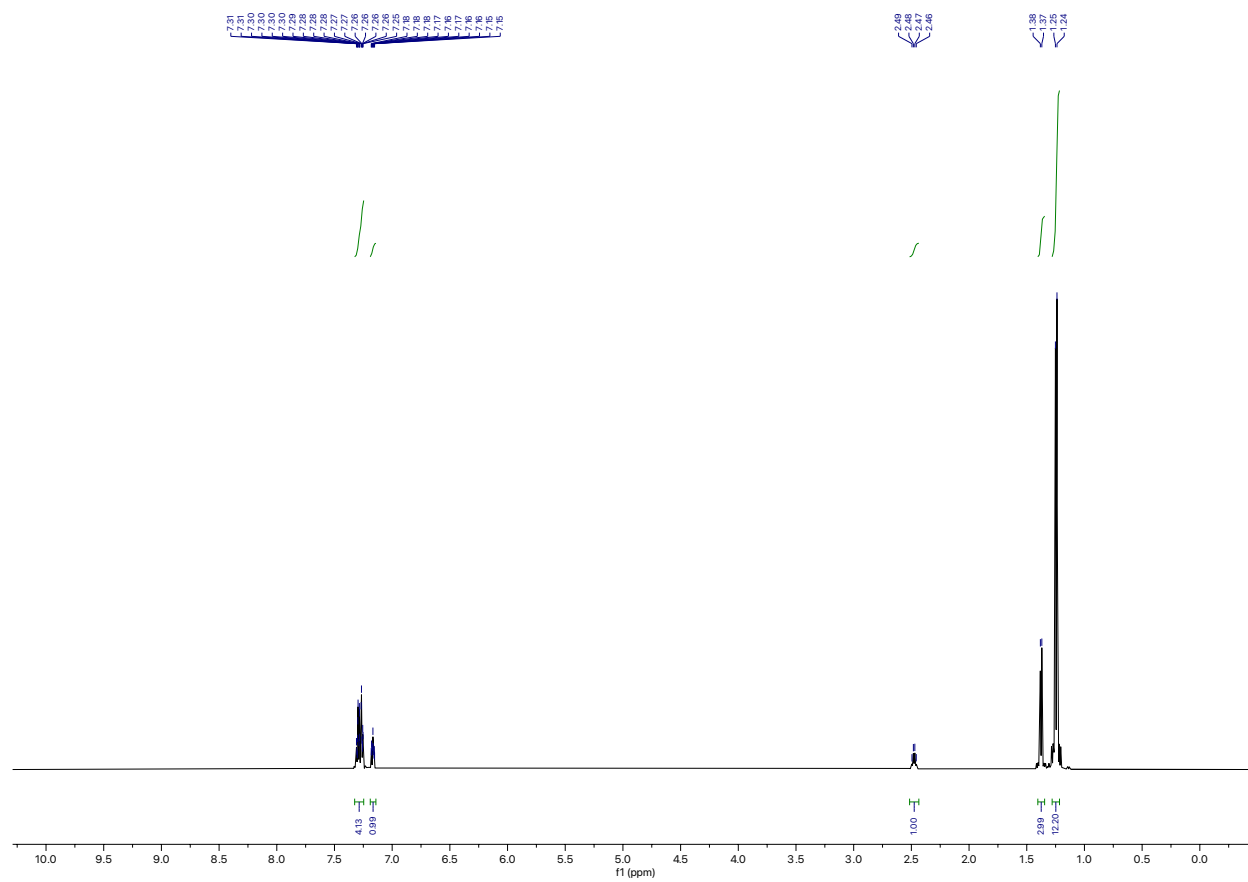

$^{13}\text{C}$  NMR (151 MHz,  $\text{CDCl}_3$ ):

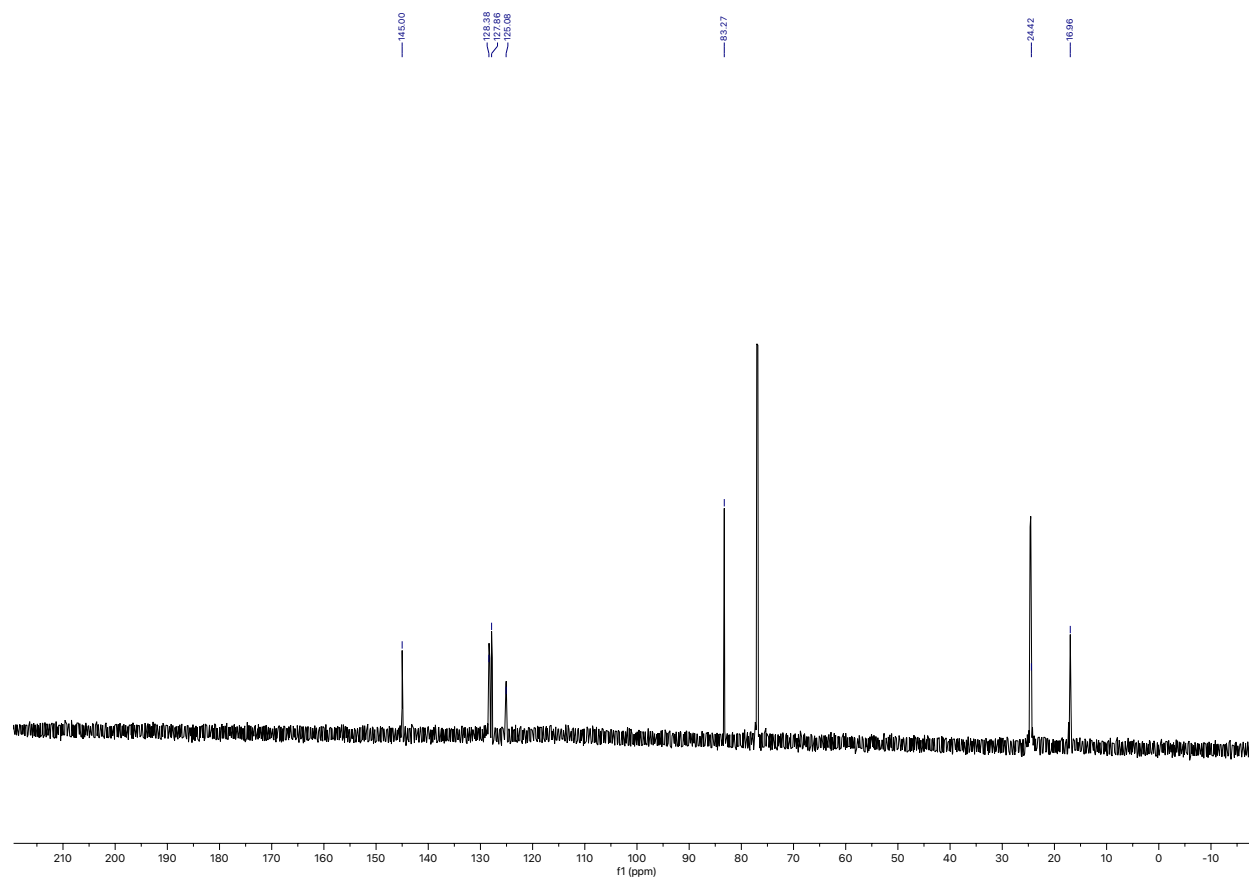

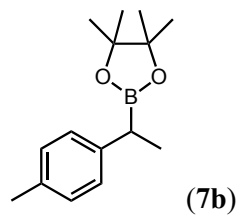

$^1\text{H}$  NMR (600 MHz,  $\text{CDCl}_3$ ):

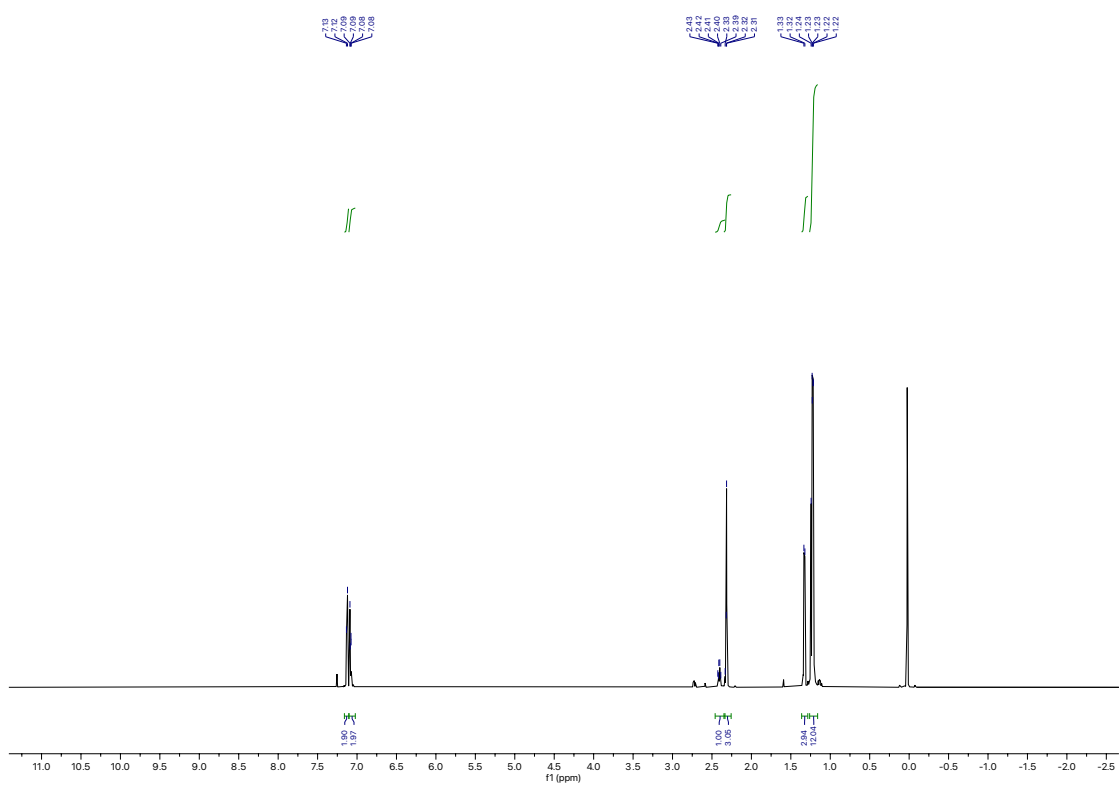

$^{13}\text{C}$  NMR (151 MHz,  $\text{CDCl}_3$ ):

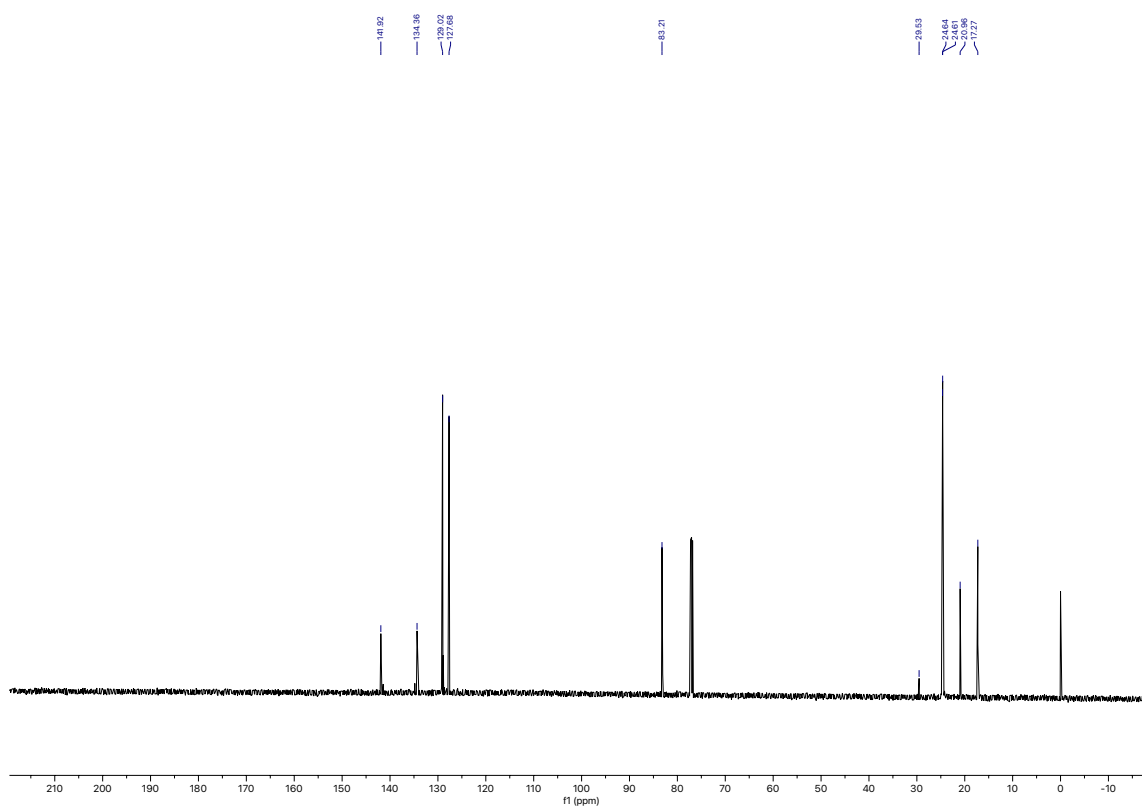



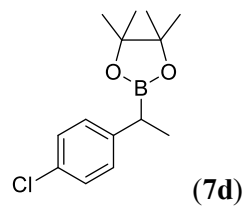

$^1\text{H}$  NMR (500 MHz,  $\text{CDCl}_3$ ):

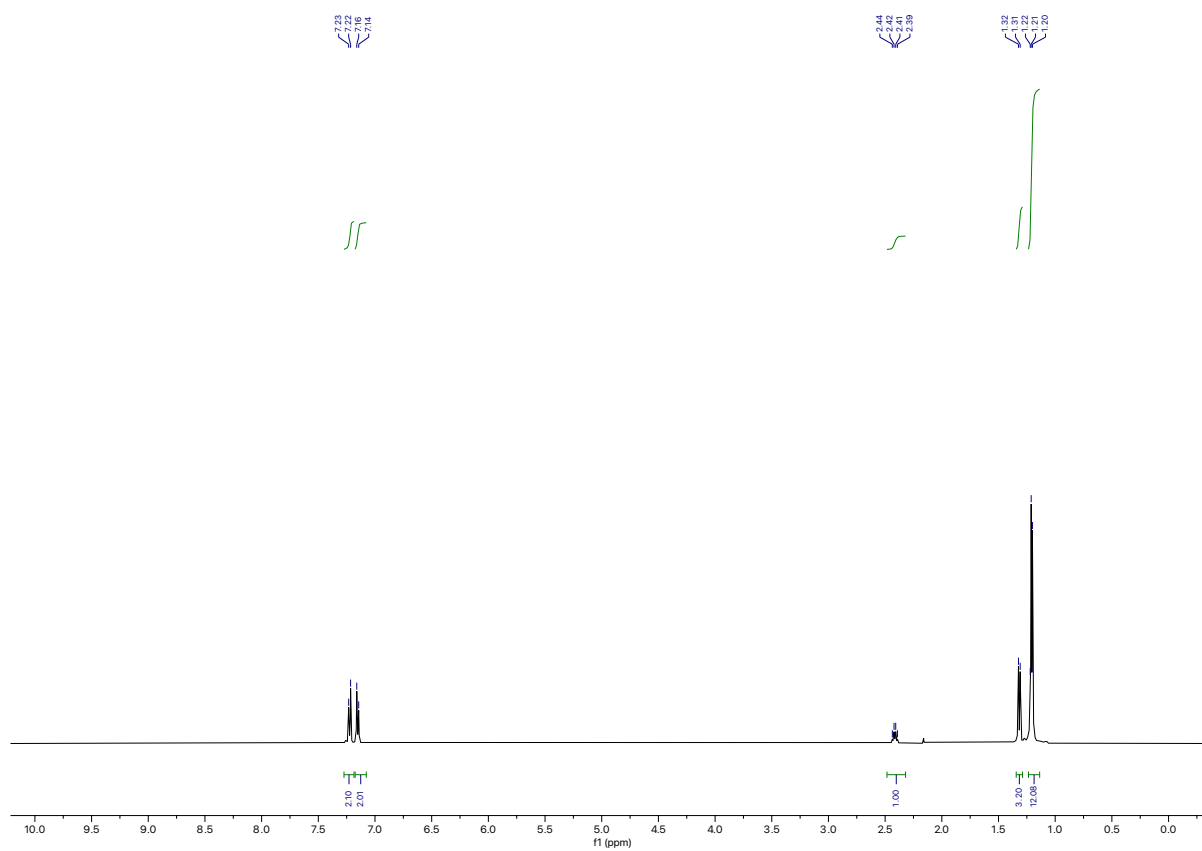

$^{13}\text{C}$  NMR (126 MHz,  $\text{CDCl}_3$ ):

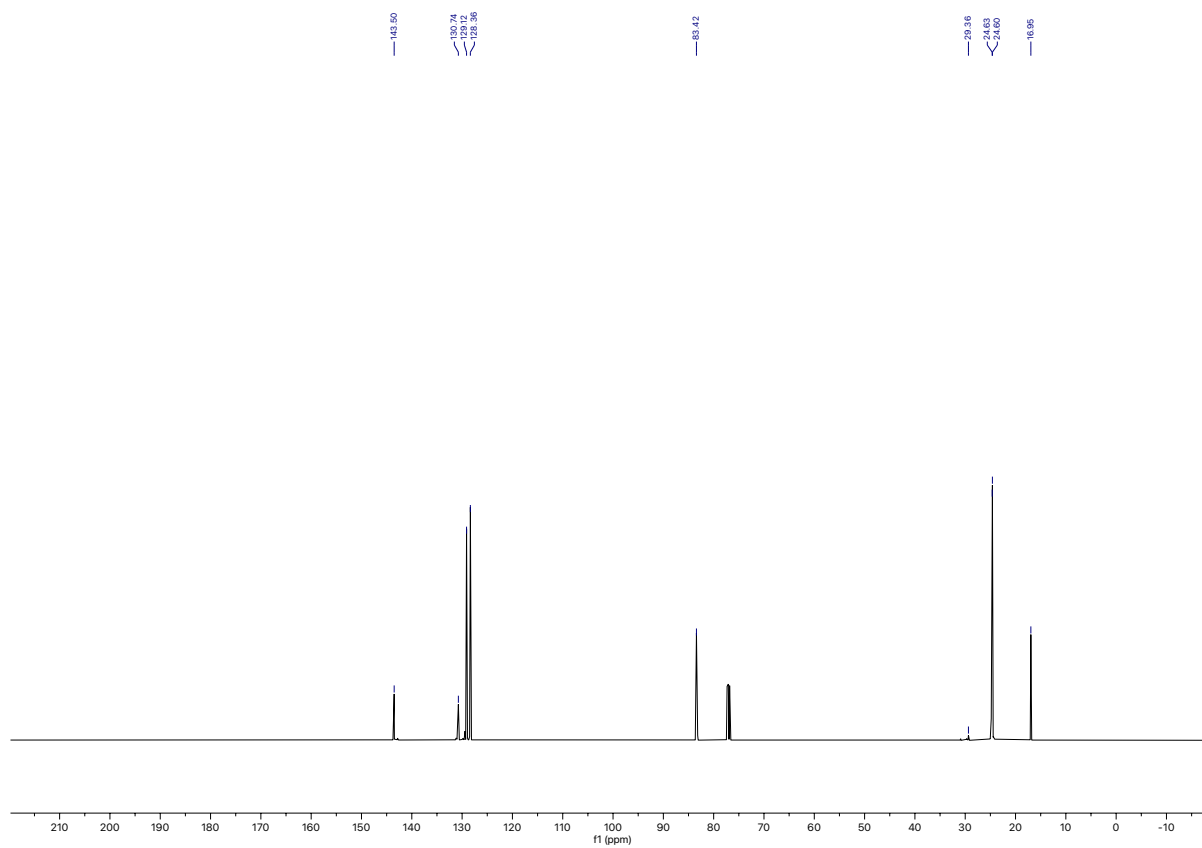

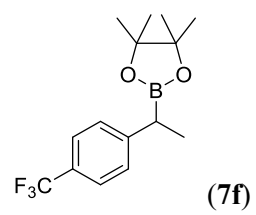

$^1\text{H}$  NMR (500 MHz,  $\text{CDCl}_3$ ):

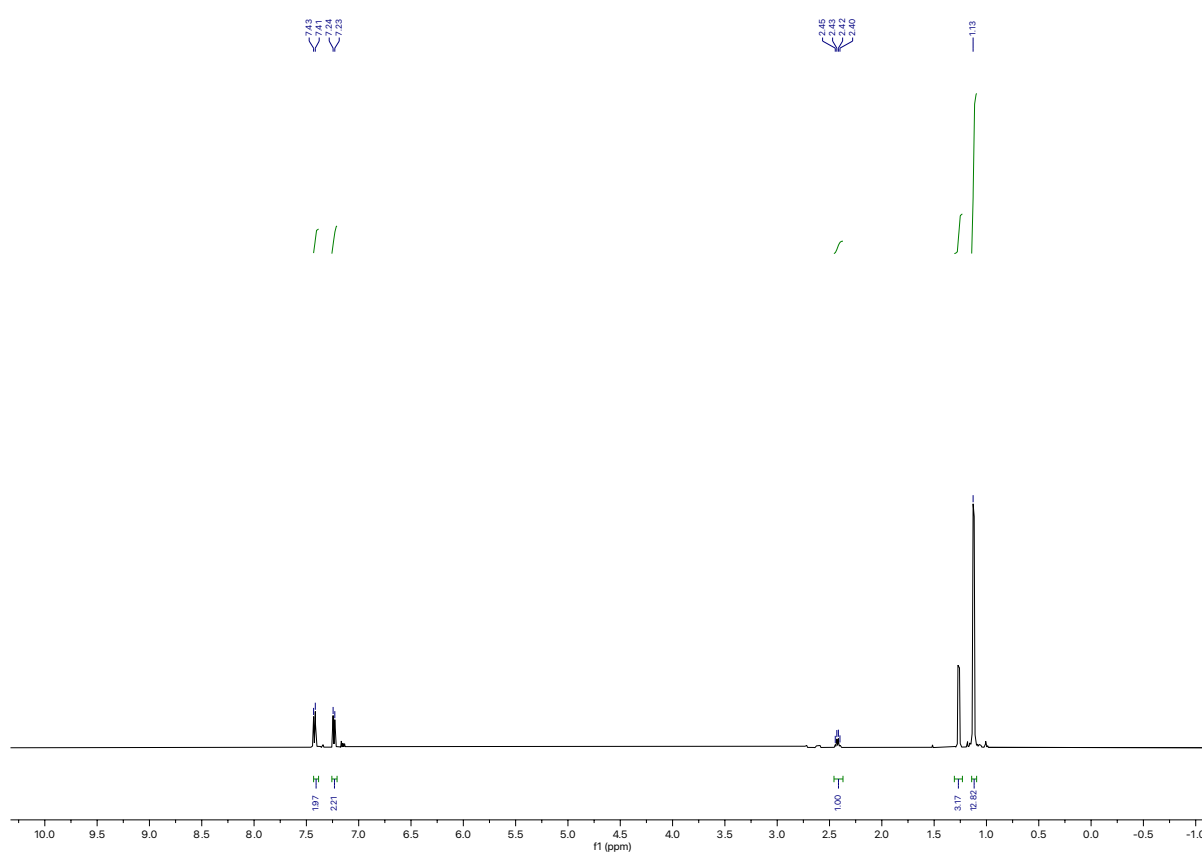

$^{13}\text{C}$  NMR (126 MHz,  $\text{CDCl}_3$ ):

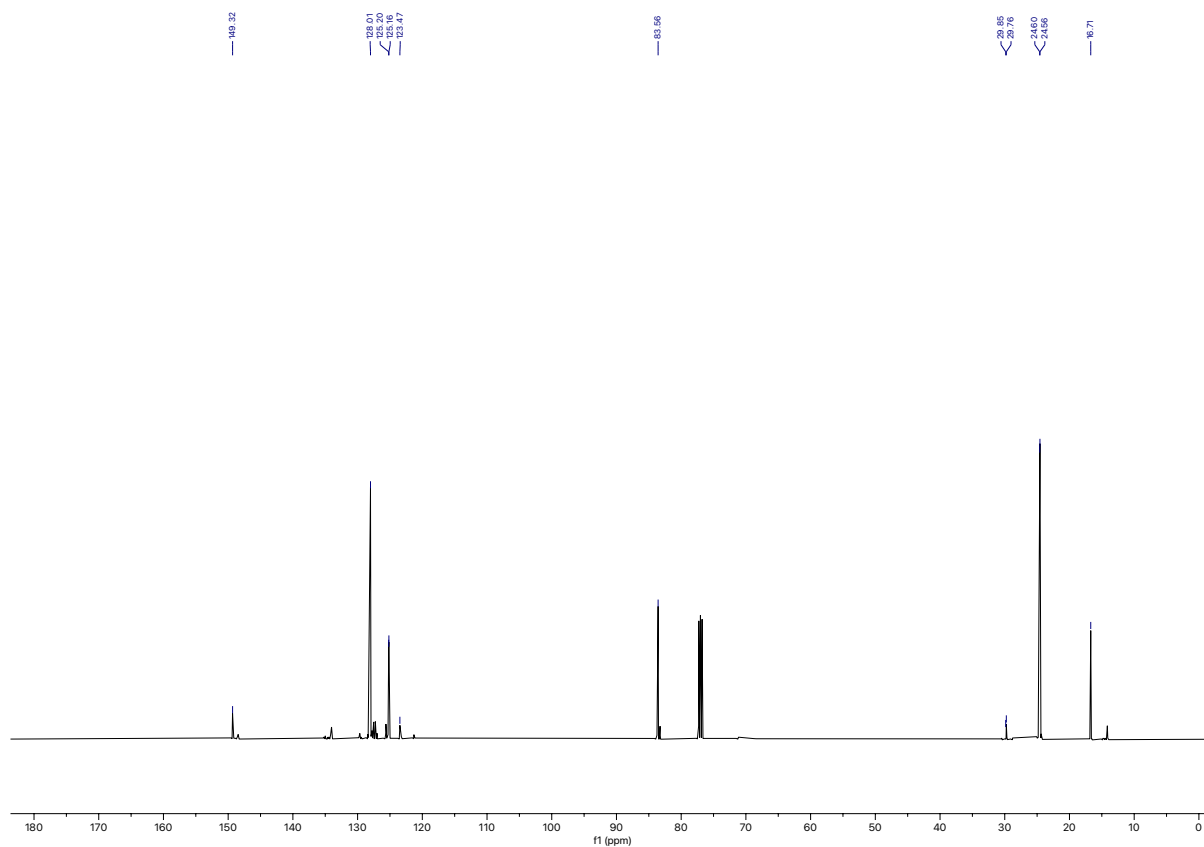

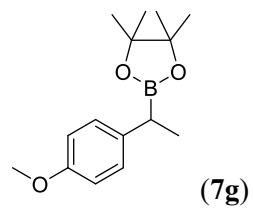

$^1\text{H}$  NMR (600 MHz,  $\text{CDCl}_3$ ):

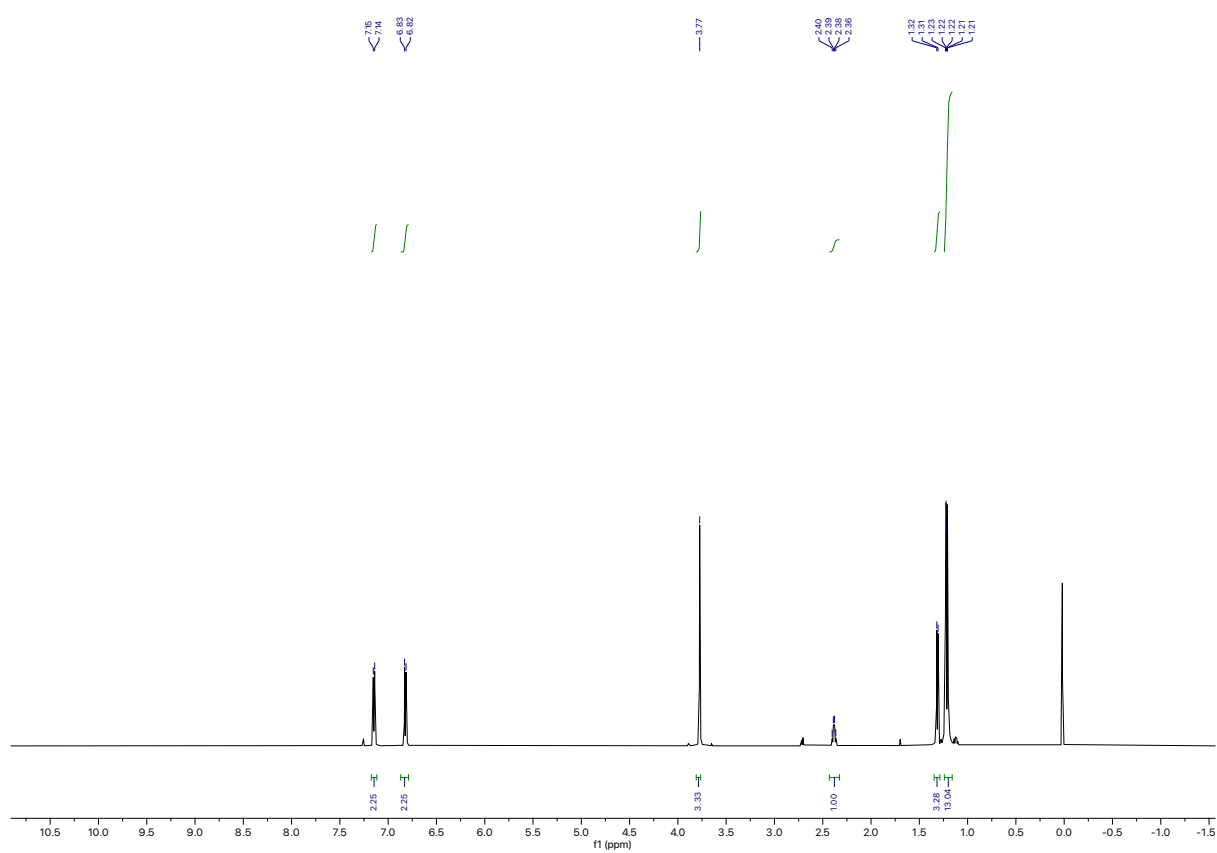

$^{13}\text{C}$  NMR (151 MHz,  $\text{CDCl}_3$ ):

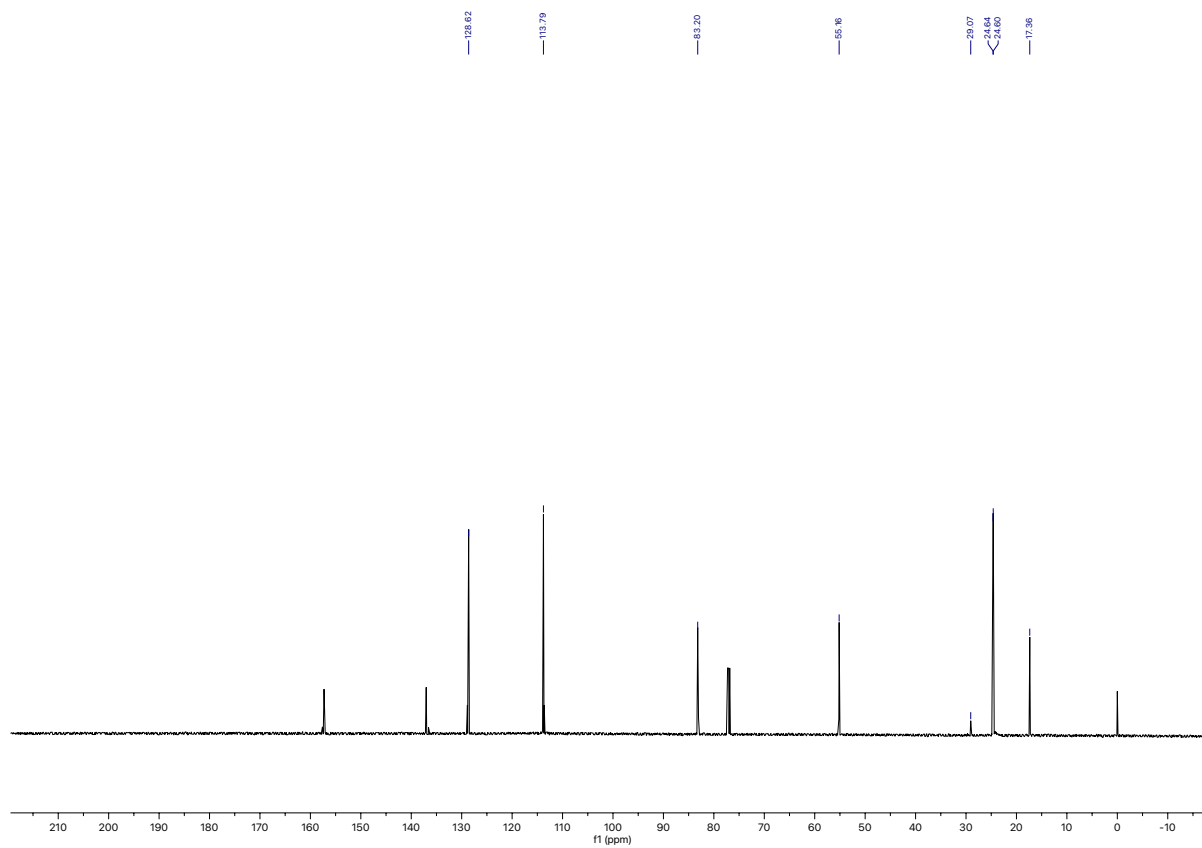

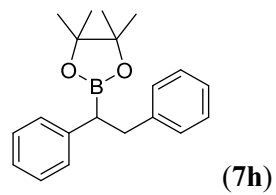

$^1\text{H}$  NMR (600 MHz,  $\text{CDCl}_3$ ):

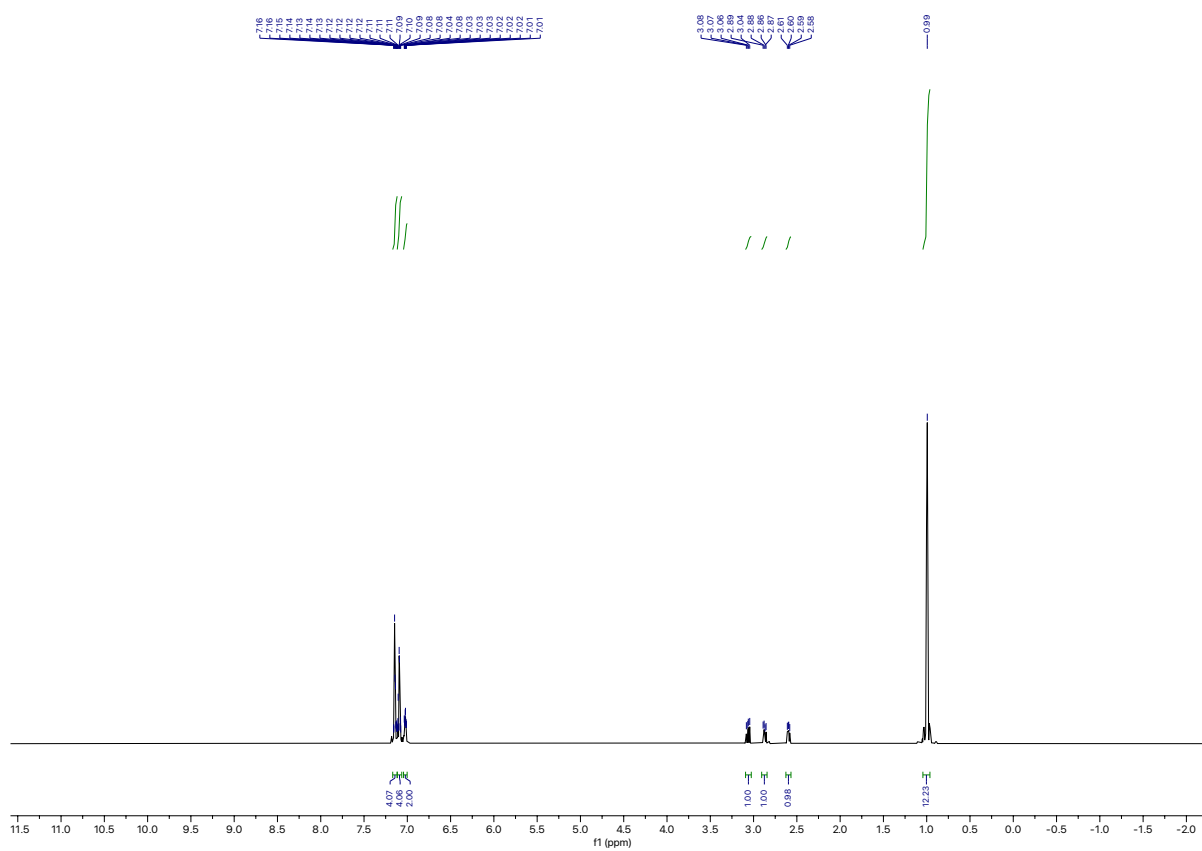

$^{13}\text{C}$  NMR (151 MHz,  $\text{CDCl}_3$ ):

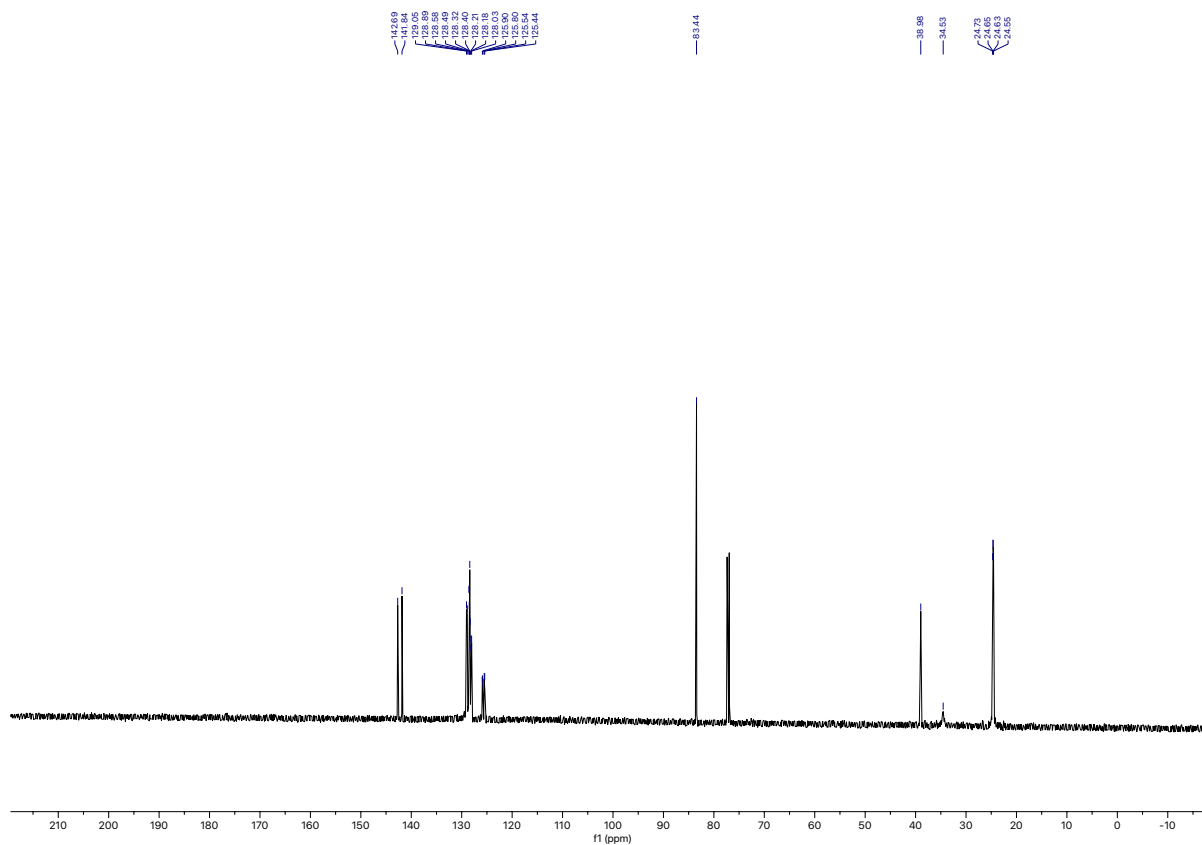



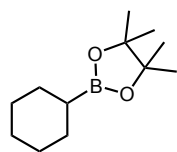**(7m)**

$^1\text{H}$  NMR (500 MHz,  $\text{CDCl}_3$ ):

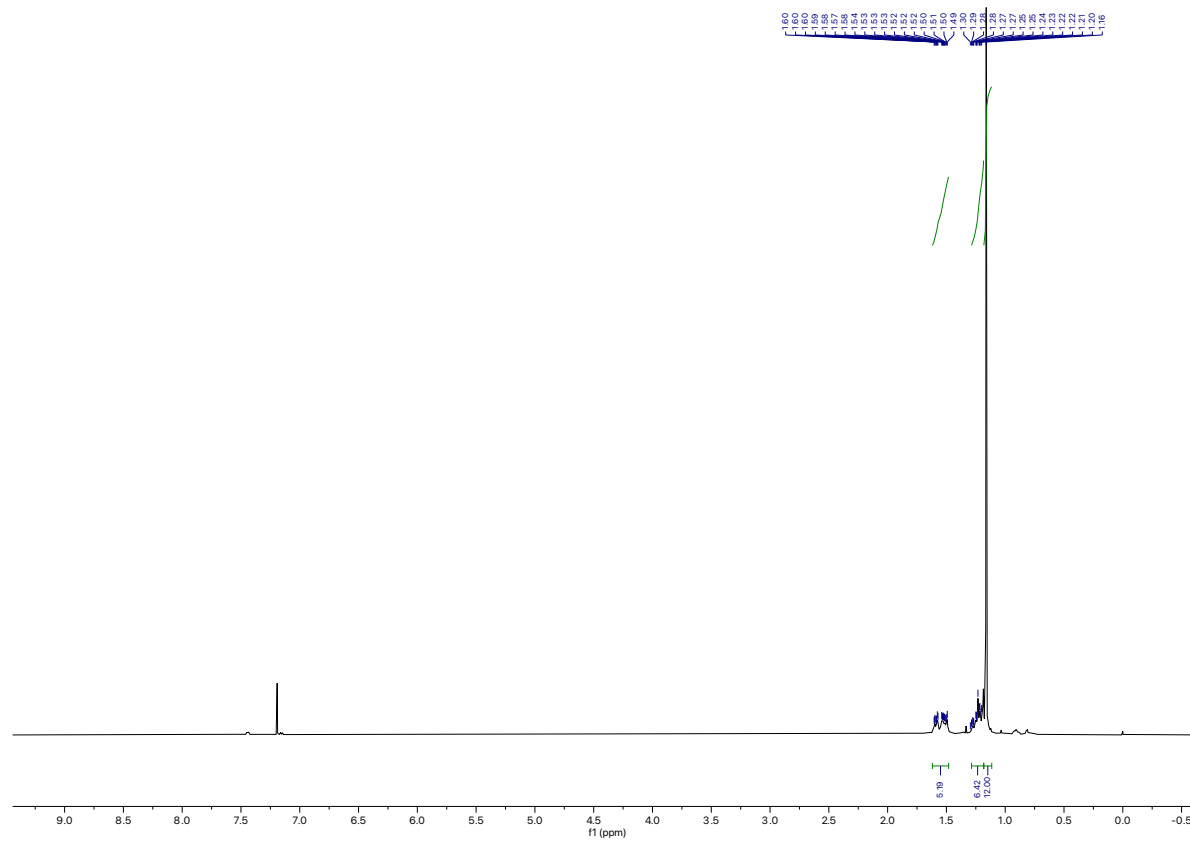

$^{13}\text{C}$  NMR (126 MHz,  $\text{CDCl}_3$ ):

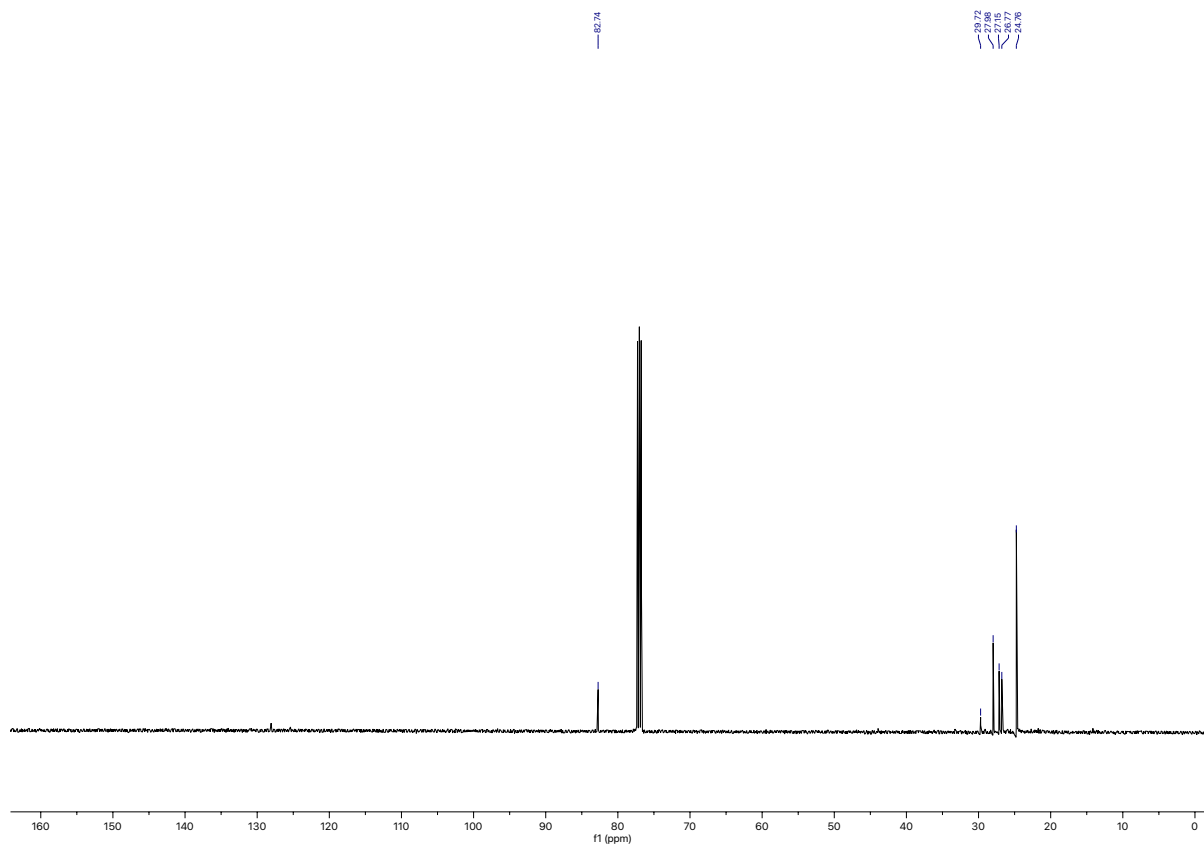

## References:

(1) G. Zhang, J. Wu, S. Li, S. Cass and S. Zheng, *Org. Lett.*, 2018, **20**, 7893-7897.
